# Supplementary material
Source: publisher site journal article supplement (https://www.dovepress.com/article/474806)
Supplement: Supplementary file 1 [file get_supplementary_file.php]

**Appendices**

Appendix 1 - Information Sheet

Appendix 1a - Study Information Sheet

Dear Trainee,

You are invited to take part in a study examining the effects of stress on cataract surgery performance, using an EyeSi simulator. Participation is entirely voluntary and the whole experience should not take more than 45 minutes. Please see the information leaflet attached. If you are interested please reply to this email prior to 20th February 2023.

Thank you!

Gwyn Williams

Dear Trainees - cataract surgery is one of the most important operations you will learn as part of your training in ophthalmology. It can also be a stressful experience. It is because of this that we are going to study how a common scenario experienced by trainees affects their performance, and how this compares to the same experience in consultants.

We hope that the results of this study will help guide training in ophthalmology and help lay down ground rules with how trainees are taught in future. In this way your participation will be valuable to future trainees and to the profession.

Study

45 minutes of your time will be required for you to attend the EyeSi cataract simulator at Singleton Hospital and carry out a number of simulated cataract operations; some with distractions, some without. We will also measure your blood pressure and pulse rate for each operation. Your scores as part of the operations will not be part of your training record and will not be known to any ophthalmic staff, with the results entirely anonymised. After the study is completed the scores will all be deleted. Your participation is entirely voluntary and you may withdraw from the process at any time.

When

We hope to run the sessions over several weekends and evenings and will do our best to accommodate you if you can only attend at certain dates or times. Please do not worry if you cannot attend or do not want to attend. Please email Gwyn Williams at [gwynwilliams@doctors.org.uk](mailto:gwynwilliams@doctors.org.uk) for more information; alternatively call 07931357037.

Appendix 1b - Debrief Sheet

Thank you very much for taking part. As you can see the distraction alluded to was the all-too familiar having to deal with phonecalls from elsewhere while operating, as well as other common theatre distractions. Many of you have complained in the past about this being a distraction but there are as yet no rules preventing this from taking place. Should the results of this study demonstrate a significant issue with distractions increasing cognitive load to levels adversely affecting surgical performance then the investigators will use this data to lobby the RCOphth to introduce such guidance. In this manner your contribution will have improved training for future trainees. Should the study demonstrate no ill-effect then this too is valuable information. When we have processed the results we will present them at the Welsh Ophthalmic Forum in October.

Again - thank you for giving your time!

Appendix 2 - Consent Form

You are invited to take part in some research. Before you decide whether or not to participate, it is important for you to understand why the research is being conducted and what it will involve. Please read the following information carefully.
 
**What is the purpose of the research?** *This study aims to understand factors affecting surgical performance in trainee ophthalmologists with a view to improving the training experience.*
 **Who is undertaking the research?***The research is being carried by ophthalmologists at Singleton Hospital in conjunction with Swansea University. The research has been approved by the Swansea University Medical School Research Ethics Committee.*
 **What happens if I agree to take part?** *You will be asked to perform some simulated cataract operations, similar to regular training experiences, under slightly different conditions.*
 **Are there any risks associated with taking part?** *We do not foresee any risks associated with this research however, you are free to withdraw at any point throughout the study.*
 **Data Protection and Confidentiality** *Your data will be processed in accordance with the Data Protection Act 2018 and the General Data Protection Regulation 2016 (GDPR). Confidentiality will be strictly maintained, all information about you will only be viewed by the researchers at Swansea University. Data about you will also be made anonymous and any identifiable data will be stored separately, to the data obtained from the study. Therefore, if you decide to withdraw from the study at a later date, it will not be possible to identify and remove your individual data.*
 **What will happen to the information I provide?** *The information you provide will be analysed and form part of the research report. This analysis may be presented to third parties and published in scientific journals and related media. All information in the reports will be anonymous and unidentifiable.*
 **Is participation voluntary and what if I wish to later withdraw?** *Participation is voluntary and you can withdraw from the study at any point, without needing to provide any reason.*
 **Data Protection Privacy Notice.** *Swansea University will be the data controller for this project. The University Data Protection Officer provides oversight of university activities involving the processing of personal data, and can be contacted at the Vice Chancellors Office. Your personal data will be processed only for the purposes outlined in this information sheet. Consent will be required for participation in the study, through completion of this consent form. The legal basis that we will rely on to process your personal data will be processing is necessary for the performance of a task carried out in the public interest. This public interest justification is approved by the Swansea University Medical School Research Ethics Committee, Swansea University. The legal basis that we will rely on to process special categories of data will be processing is necessary for archiving purposes in the public interest, scientific or historical research purposes or statistical purposes*.
 **How long will your information be held?** *Data will be preserved and accessible for a minimum of 10 years after completion of the research but will be entirely anonymised, with the file linking trainee to particular scores selected at the completion of the research.*
 **What are your rights?** *You have a right to access your personal information, to object to the processing of your personal information, to rectify, to erase, to restrict and to port your personal information. Please visit the University Data Protection webpages for further information in relation to your rights. Any requests or objections should be made in writing to the University Data Protection Officer:- University Compliance Officer (FOI/DP) Vice-Chancellor’s Office Swansea University Singleton Park Swansea SA2 8PP Email: dataprotection@swansea.ac.uk*
 **How to make a complaint.** *If you are unhappy with the way in which your personal data has been processed you may in the first instance contact the University Data Protection Officer using the contact details above. If you remain dissatisfied then you have the right to apply directly to the Information Commissioner for a decision. The Information Commissioner can be contacted at: - Information Commissioner’s Office, Wycliffe House, Water Lane, Wilmslow, Cheshire, SK9 5AF www.ico.org.uk*

 **What if I have other questions?** If you have further questions about this study, please do not hesitate to contact us: Gwyn Williams, Consultant Ophthalmologist gwynwilliams@doctors.org.uk, Professor Phil Newton Swansea University p.newton@swansea.ac.uk

By signing below you consent to take part in this study:

Signature Participant:

Date:

Signature Investigator:

Date:

Appendix 3 - Scenarios

Scenario A

Volunteer holding phone (V): Hello? There is a call from eye casualty. Can you take it?

V: A 16 year old man has come in with a corneal ulcer. They want to know what to do?

V: What antibiotic regime do you advise?

V: What do you want to do about steroid drops?

V: When do you want to see them again?

Scenario B

V: There is another call from eye casualty. Can you take it?

V: A 28 year old woman has come in with swollen discs. What do you advise?

V: They want to know if you want a scan? If so what scan?

V: Do you want to send them to a neurologist for a lumbar puncture?

V: When do you want to see them again?

Scenario C

V: So sorry about this the eye casualty are on the phone again. Can you take the call?

V: A 56 year old man has an eye trauma. Metalwork injury with an open globe. What do you want to do?

V: Do you want them to do a scan or fields or some other test?

V: They want to go home what do you advise?

V: Do you want to start them on any medication or drops?

If a participant states that they will call them back and not to ask any more questions the standard response, mimicking reality, will be: They need to know now, there are patients piling up and they can’t get hold of the consultant
